# Supplementary material
Source: publisher figshare collection journal article supplement (https://plos.figshare.com/articles/dataset/_/7340195)
Supplement: Supplementary file [file 1]

## C Interactions

|             | (1) Accept | (2) Accept | (3) Accept | (4) Accept          |
|-------------|------------|------------|------------|---------------------|
| Dist1l*Low  |            |            |            | 0.134<br>(0.0840)   |
| Dist2l*Low  |            |            |            | 0.118<br>(0.0904)   |
| Dist3l*Low  |            |            |            | 0.0524<br>(0.101)   |
| Dist4l*Low  |            |            |            | 0.0805<br>(0.110)   |
| Dist5l*Low  |            |            |            | 0.109<br>(0.109)    |
| Dist1r*Low  |            |            |            | 0.0350<br>(0.0687)  |
| Dist2r*Low  |            |            |            | 0.112<br>(0.0814)   |
| Dist3r*Low  |            |            |            | 0.0973<br>(0.102)   |
| Dist4r*Low  |            |            |            | 0.0760<br>(0.109)   |
| Dist5r*Low  |            |            |            | 0.119<br>(0.103)    |
| Dist1l*High |            |            |            | 0.165<br>(0.0945)   |
| Dist2l*High |            |            |            | 0.140<br>(0.0959)   |
| Dist3l*High |            |            |            | 0.252*<br>(0.0995)  |
| Dist4l*High |            |            |            | 0.205*<br>(0.0967)  |
| Dist5l*High |            |            |            | 0.195*<br>(0.0881)  |
| Dist1r*High |            |            |            | 0.0323<br>(0.0597)  |
| Dist2r*High |            |            |            | 0.144*<br>(0.0679)  |
| Dist3r*High |            |            |            | 0.235**<br>(0.0800) |
| Dist4r*High |            |            |            | 0.177<br>(0.0973)   |
| Dist5r*High |            |            |            | 0.145<br>(0.106)    |
| $N$         | 1122       | 1122       | 1122       | 1122                |

\*  $p < 0.10$ , \*\*  $p < 0.05$ , \*\*\*  $p < 0.01$

Table 10: Interactions of Table 4
