# Supplementary material
Source: publisher figshare collection journal article supplement (https://plos.figshare.com/articles/dataset/_/7340195)
Supplement: Supplementary file [file 1]

## D Two Sided Fisher Tests

Two-Sided Fisher test comparing treatments for the Costly Rejection setup.

|           | \$0   | \$1   | \$2   | \$3   | \$4   | \$5   | \$6   | \$7   | \$8   | \$9   | \$10  |
|-----------|-------|-------|-------|-------|-------|-------|-------|-------|-------|-------|-------|
| L-1 = H-1 | 1.000 | 0.782 | 0.779 | 1.000 | 1.000 | 0.610 | 1.000 | 0.467 | 1.000 | 1.000 | 0.224 |

Table 12: Two-Sided Fisher  $p$ -values
