# Supplementary material
Source: publisher figshare collection journal article supplement (https://plos.figshare.com/articles/dataset/_/7340195)
Supplement: Supplementary file [file 1]

Table 11: Interactions for Table 8

| (a) Baseline |                    | (b) Costly |                    |
|--------------|--------------------|------------|--------------------|
| Dist1r*Low   | 0.312<br>(0.278)   | dist1r*H-1 | -0.001<br>(0.446)  |
| Dist2r*Low   | 0.586*<br>(0.290)  | dist2r*H-1 | 0.484<br>(0.631)   |
| Dist3r*Low   | 0.549<br>(0.328)   | dist3r*H-1 | 0.364<br>(0.619)   |
| Dist4r*Low   | 0.494<br>(0.356)   | dist4r*H-1 | 0.310<br>(0.618)   |
| Dist5r*Low   | 0.602<br>(0.342)   | dist5r*H-1 | 0.549<br>(0.623)   |
| Dist1l*Low   | 0.637*<br>(0.294)  | dist1l*H-1 | 0.367<br>(0.489)   |
| Dist2l*Low   | 0.600*<br>(0.300)  | dist2l*H-1 | 0.458<br>(0.537)   |
| Dist3l*Low   | 0.382<br>(0.370)   | dist3l*H-1 | 0.559<br>(0.556)   |
| Dist4l*Low   | 0.465<br>(0.433)   | dist4l*H-1 | 0.669<br>(0.565)   |
| Dist5l*Low   | 0.559<br>(0.470)   | dist5l*H-1 | 0.726<br>(0.582)   |
| Dist1r*High  | 0.286<br>(0.260)   | dist1r*L-1 | 0.568<br>(0.368)   |
| Dist2r*High  | 0.655*<br>(0.282)  | dist2r*L-1 | 0.593<br>(0.428)   |
| Dist3r*High  | 0.881**<br>(0.318) | dist3r*L-1 | 0.810<br>(0.445)   |
| Dist4r*High  | 0.726<br>(0.372)   | dist4r*L-1 | 0.756<br>(0.389)   |
| Dist5r*High  | 0.635<br>(0.386)   | dist5r*L-1 | 0.550<br>(0.416)   |
| Dist1l*High  | 0.718<br>(0.375)   | dist1l*L-1 | 1.116**<br>(0.399) |
| Dist2l*High  | 0.617<br>(0.346)   | dist2l*L-1 | 1.133*<br>(0.453)  |
| Dist3l*High  | 0.925*<br>(0.380)  | dist3l*L-1 | 1.322**<br>(0.471) |
| Dist4l*High  | 0.837*<br>(0.389)  | dist4l*L-1 | 1.427**<br>(0.484) |
| Dist5l*High  | 0.865*<br>(0.385)  | dist5l*L-1 | 1.200**<br>(0.517) |
| $N$          | 1122               | $N$        | 1111               |
